# Supplementary material
Source: PubMed Central journal article supplement (PMC9036537)
Supplement: NIHMS1797915-supplement-1.pdf [file NIHMS1797915-supplement-1.pdf]

Supplemental online content for:

## Harmonized Outcome Measures for Use in Non–Small Cell Lung Cancer Patient Registries and Clinical Practice

Martin J. Edelman, MD; Daniel P. Raymond, MD; Dwight H. Owen, MD, MS; Michelle B. Leavy, MPH; Kari Chansky, MS; Sriram Yennu, MD; Felix G. Fernandez, MD, MSc; Carolyn J. Presley, MD, MHS; Tithi Biswas, MD; Gwendolyn P. Quinn, PhD; Matthew B. Schabath, PhD; Seth Sheffler-Collins, MPH; Laura Chu, MPH; and Richard E. Gliklich, MD

*J Natl Compr Canc Netw*, doi: 10.6004/jnccn.2021.7021

**eTable 1:** Invited Registries/Initiatives That Declined to Participate

**eTable 1. Invited Registries/Initiatives That Declined to Participate**

| Initiative/Registry Name                                                                                                                                                      | Sponsoring Organization                                                  | Primary Purpose                                                                                                                                                                    |
|-------------------------------------------------------------------------------------------------------------------------------------------------------------------------------|--------------------------------------------------------------------------|------------------------------------------------------------------------------------------------------------------------------------------------------------------------------------|
| A Pilot Study to Develop Predictive Biomarkers for the Response to Immunotherapy in Lung Cancer (ClinicalTrials.gov identifier: NCT03047616)                                  | Abramson Cancer Center of the University of Pennsylvania                 | To broadly discover and evaluate the utility of blood-based biomarkers for use in measuring and predicting response to immunotherapy in patients with lung cancer.                 |
| NYS Cancer Registry                                                                                                                                                           | NYS                                                                      | To collect information on new cases and cancer deaths in NYS.                                                                                                                      |
| The Lung Cancer Registry                                                                                                                                                      | GO2 Foundation for Lung Cancer, American Lung Association, and the IASLC | To develop a robust source of data on patients with lung cancer to support research to improve diagnosis, treatment, and patient outcomes.                                         |
| Lung Cancer Screening Registry                                                                                                                                                | American College of Radiology                                            | To improve quality of care and outcomes for patients undergoing CT lung cancer screening. The registry is a QCDR and meets quality reporting requirements for the CMS.             |
| CCR                                                                                                                                                                           | State of California                                                      | To collect information about cancers diagnosed in California to improve understanding of cancer and to develop strategies and policies for its prevention, treatment, and control. |
| Safety profiles of patients with NSCLC treated with pemetrexed + carboplatin: a real-world retrospective, observational, cohort study (doi.org/10.1080/03007995.2017.1297700) | Eli Lilly and Company                                                    | To examine the characteristics and safety profile of a NSCLC population treated with PCb area under the concentration-time curve 5 (PCb5) or 6 (PCb6) under real-world conditions. |

Abbreviations: CCR, California Cancer Registry; CMS, Centers for Medicare & Medicaid Services; IASLC, International Association for the Study of Lung Cancer; NSCLC, non-small cell lung cancer; NYS, New York State; PCb, paclitaxel + carboplatin; PCb5, PCb at 5 mg/mL•min; PCb6, PCb at 6 mg/mL•min; QCDR, qualified clinical data registry.
